# Supplementary material for: New perspectives on the plant PARP family: Arabidopsis PARP3 is inactive, and PARP1 exhibits predominant poly (ADP-ribose) polymerase activity in response to DNA damage
Source: PubMed Central journal article supplement (PMC6701155; doi:10.1186/s12870-019-1958-9), 2019-08-19

 *AtPARP1*
 *AtPARP2*
 *AtPARP3*

(A)

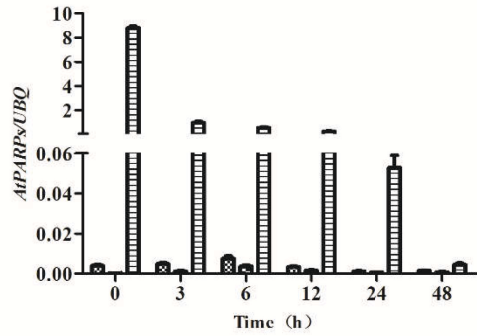

(B)

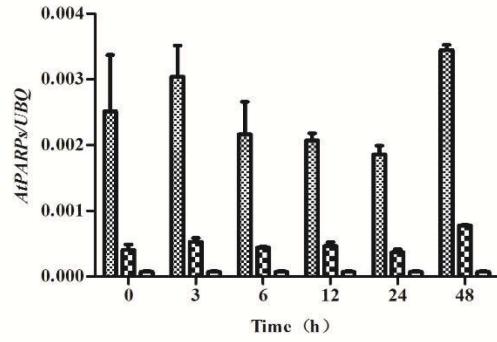

(C)

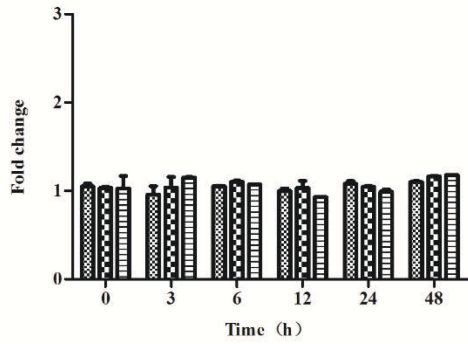

(D)

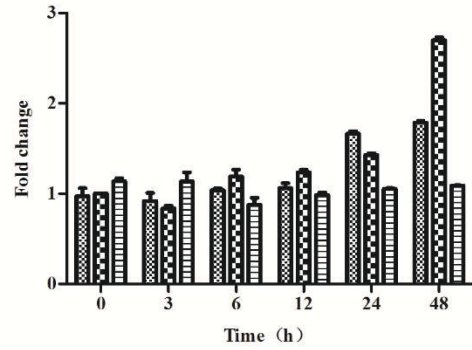

(E)

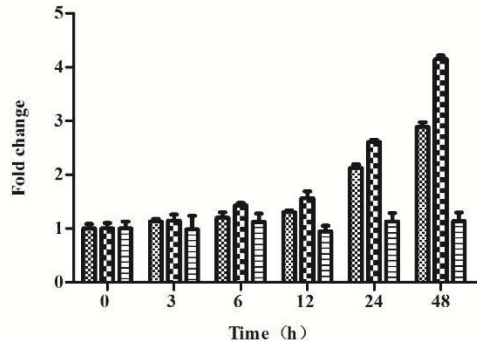

(F)

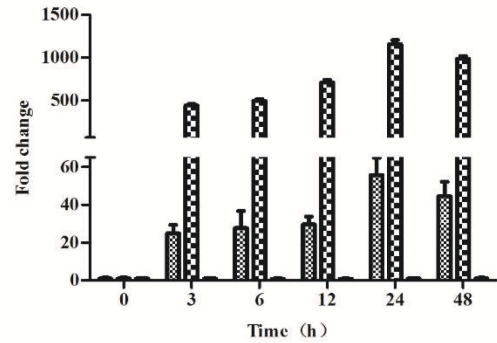

Supplement: 12870_2019_1958_MOESM4_ESM.pdf [file 12870_2019_1958_MOESM4_ESM.pdf]
