# Supplementary material for: New perspectives on the plant PARP family: Arabidopsis PARP3 is inactive, and PARP1 exhibits predominant poly (ADP-ribose) polymerase activity in response to DNA damage
Source: PubMed Central journal article supplement (PMC6701155; doi:10.1186/s12870-019-1958-9), 2019-08-19

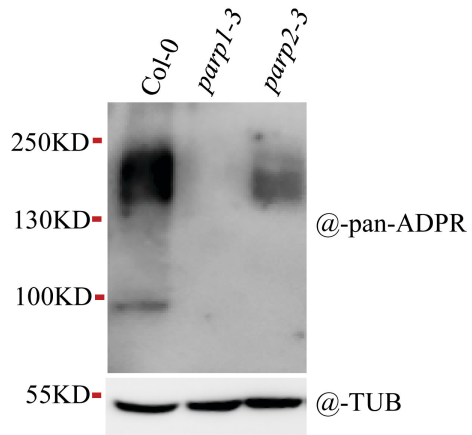

Supplement: 12870_2019_1958_MOESM6_ESM.pdf [file 12870_2019_1958_MOESM6_ESM.pdf]
