# Supplementary material for: New perspectives on the plant PARP family: Arabidopsis PARP3 is inactive, and PARP1 exhibits predominant poly (ADP-ribose) polymerase activity in response to DNA damage
Source: PubMed Central journal article supplement (PMC6701155; doi:10.1186/s12870-019-1958-9), 2019-08-19

**(A)**

|              |   |    |   |   |   |    |    |   |    |   |   |   |    |    |
|--------------|---|----|---|---|---|----|----|---|----|---|---|---|----|----|
| TRXH         | + | +  | - | - | - | -  | -  | - | -  | - | - | - | -  | -  |
| MBD          | - | -  | - | - | - | -  | -  | + | +  | - | - | - | -  | -  |
| TRXH-AtPARP1 | - | -  | + | + | + | +  | +  | - | -  | - | - | - | -  | -  |
| MBD-AtPARP1  | - | -  | - | - | - | -  | -  | - | +  | + | + | + | +  | +  |
| Time (min)   | 0 | 30 | 0 | 1 | 5 | 15 | 30 | 0 | 30 | 0 | 1 | 5 | 15 | 30 |

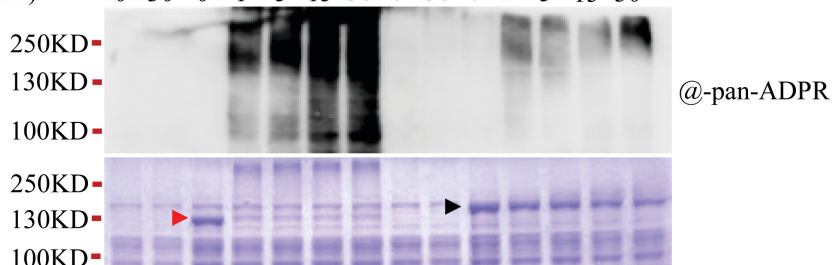

**(B)**

|              |    |   |   |   |    |    |    |   |   |   |    |    |    |    |
|--------------|----|---|---|---|----|----|----|---|---|---|----|----|----|----|
| TRXH         | +  | - | - | - | -  | -  | -  | - | - | - | -  | -  | -  | -  |
| MBD          | -  | - | - | - | -  | -  | -  | + | - | - | -  | -  | -  | -  |
| TRXH-AtPARP2 | -  | + | + | + | +  | +  | -  | - | - | - | -  | -  | -  | -  |
| MBD-AtPARP2  | -  | - | - | - | -  | -  | -  | + | + | + | +  | +  | +  | +  |
| Time (min)   | 30 | 0 | 1 | 5 | 15 | 30 | 30 | 0 | 1 | 5 | 15 | 30 | 30 | 30 |

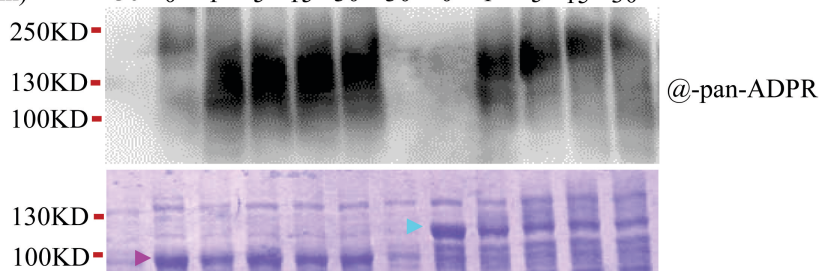

Supplement: 12870_2019_1958_MOESM8_ESM.pdf [file 12870_2019_1958_MOESM8_ESM.pdf]
