# Supplementary material for: New perspectives on the plant PARP family: Arabidopsis PARP3 is inactive, and PARP1 exhibits predominant poly (ADP-ribose) polymerase activity in response to DNA damage
Source: PubMed Central journal article supplement (PMC6701155; doi:10.1186/s12870-019-1958-9), 2019-08-19
Supplement: 12870_2019_1958_MOESM10_ESM.pdf [file 12870_2019_1958_MOESM10_ESM.pdf]

**Table S1. Primers used in this work.**

| Purpose                                                | Primer name                                 | Sequence (5'-3')                               |
|--------------------------------------------------------|---------------------------------------------|------------------------------------------------|
| Protein expression vector construction                 | PARP1-pET32a-FP (Sal I)                     | CGAGCTCAAATGGCAAGCCACATAAGC                    |
|                                                        | PARP1-pET32a-RP (NotI)                      | AAGGAAAAA GCGGCCGCTTCTCTGTGCTTAAACCTTACTTTC    |
|                                                        | PARP1-pMALL-FP (NdeI)                       | GGGAATCCATATGATGGCAAGCCACATAAGC                |
|                                                        | PARP1-pMALL-RP (Sal I)                      | ACCGTCGACTCATCTCTGTGCTTAAACCTTACT              |
|                                                        | PARP2-pET32a-FP (BamHI)                     | CGCGGATCCA TGGCGAACAAGCTCAAAGTC                |
|                                                        | PARP2-pET32a-RP (XhoI)                      | CCGCTCGAGTATAGTCTTGTAGTTGAATTTGACTTG           |
|                                                        | PARP3-pET32a-FP (Sall)                      | ACCGTCGACAAATGAAAGTTTCACGAGACAAGATCT           |
|                                                        | PARP3-pET32a-RP (NotI)                      | AAGGAAAAA GCGGCCGCTCTCTGGTTCGACATCGACTATCTC    |
|                                                        | PARP3-pGEX-4T-1-FP (Sall)                   | ACCGTCGACAAATGAAAGTTTCACGAGACAAGATCT           |
| PARP3-pGEX-4T-1-RP (NotI)                              | AAGGAAAAA CTCTGGTTCGACATCGACTATCTC          |                                                |
| Point mutation protein expression vector construction  | PARP1 (H-C)-RP                              | TTCGTTAATCGAGAACCACCCATAGGAGCATCTTATTGC        |
|                                                        | PARP1 (H-C)-FP                              | GCAATAAGATGCTCCTATGGTGTGGTCTCGATTAACGAA        |
|                                                        | PARP1 (Y-V)-RP                              | CTGACAAGGTCAGCAAAGACTATCCCTTTCCAAACATG         |
|                                                        | PARP1 (Y-V)-FP                              | CATGTTTGGAAAAGGGA TAGTCTTTGCTGACCTTGTGAG       |
|                                                        | PARP3 (C-H)-RP                              | TTGAGCTCCGAGACCCATGCCATAAAAGGACCTTATTT         |
|                                                        | PARP3 (C-H)-FP                              | AAATAAGGTCCTTTTATGGCATGGGTCCTCGAGCTCAA         |
|                                                        | PARP3 (V-Y)-RP                              | CTTCTGCA GCTGCATCTGAACAGTATA TCGCTCTCCCAAAC    |
| PARP3 (V-Y)-FP                                         | GTTGGGAGAGCGATATACTGTTCA GATGCA GCTGCAGAA G |                                                |
| Domain swapping protein expression vector construction | P3-P1 F1-FP                                 | GACGACGACAAAGGCCATGATGAAAGGTTTCACGAGACAAAGATCT |
|                                                        | P3-P1 F1-RP                                 | GAAAACTTATGAGGCTTCTTTTGA                       |
|                                                        | P3-P1 F2-FP                                 | AGAA GCCTCATAAGTTTTTC CCAATTCAGACCAAGTAGCAACC  |
|                                                        | P3-P1 F2-RP                                 | CGAGTGGGCCGCAAGCT TCATCTCTTGTGCTTAAACCTTACTT   |
|                                                        | P1-P3 F1-FP                                 | GACGACGACAAAGGCCATGATGCAAAGCCACATAAGC          |
|                                                        | P1-P3 F1-RP                                 | CTCTTTTTGGCTACTTGCTTATTA                       |
|                                                        | P1-P3 F2-FP                                 | AGCAAAGTAGCAAAAAAGAG CCAATTGATATGGATGATGGAAT   |
| P1-P3 F2-RP                                            | CGAGTGGGCCGCAAGCT CTACTCTGGTTCGACATCGACTATC |                                                |
| RT-qPCR                                                | qPARP3-FP                                   | ATGTTGGGAGAGCGATAGTG                           |
|                                                        | qPARP3-RP                                   | CCAAGTATGCTACGGTAATA                           |
|                                                        | qPARP1-FP                                   | GATAAACCTCCGAGAGGGAACA                         |
|                                                        | qPARP1-RP                                   | CACAGGGAACAGTCATCA                             |
|                                                        | qPARP2-FP                                   | CTCACTAACTGGGCTGGTATTT                         |
|                                                        | qPARP2-RP                                   | TCCACTCTTGGAGAACATATC                          |
|                                                        | qUBQ5-FP                                    | AATGTGAAGGCGAAGATCCAAGAC                       |
| qUBQ5-RP                                               | AGACGGAGGACGAGATGAAAGC                      |                                                |
| Protein activity assay                                 | Palindromic DNA oligo                       | GGAAATCCGGAATTCC                               |
