# Supplementary material for: New perspectives on the plant PARP family: Arabidopsis PARP3 is inactive, and PARP1 exhibits predominant poly (ADP-ribose) polymerase activity in response to DNA damage
Source: PubMed Central journal article supplement (PMC6701155; doi:10.1186/s12870-019-1958-9), 2019-08-19
Supplement: 12870_2019_1958_MOESM11_ESM.pdf [file 12870_2019_1958_MOESM11_ESM.pdf]

**Table S2. List of genes used for phylogenetic analysis of PARP1/2/3 subfamily in PARP family.**

| Species name                      | Gene name    | Protein id                  | Gene pacid | Database                                                          |
|-----------------------------------|--------------|-----------------------------|------------|-------------------------------------------------------------------|
| <i>Arabidopsis thaliana</i>       | PARP3        | AT5G22470.1                 | 19672134   | Phytozome                                                         |
| <i>Capsella rubella</i>           | PARP3        | Carubv10002547m             | 20910465   | Phytozome                                                         |
| <i>Brassica rapa</i> Fpsc         | PARP3        | Brara.J01467.1.p            | 30613201   | Phytozome                                                         |
| <i>Carica papaya</i>              | PARP3        | evm.model.supercontig_32.96 | 16417480   | Phytozome                                                         |
| <i>Theobroma cacao</i>            | PARP3        | Thecc1EG041443t1            | 27427780   | Phytozome                                                         |
| <i>Glycine max</i>                | PARP3        | Glyma.12G088300.1.p         | 30548414   | Phytozome                                                         |
| <i>Glycine max</i>                | PARP3        | Glyma.11G184100.1.p         | 30529013   | Phytozome                                                         |
| <i>Phaseolus vulgaris</i>         | PARP3        | Phvu.1011G093100.1.p        | 37156572   | Phytozome                                                         |
| <i>Medicago truncatula</i>        | PARP3        | Medtr4g053530.1             | 31107311   | Phytozome                                                         |
| <i>Cucumis sativus</i>            | PARP3        | Cucsa.385080.1              | 16982517   | Phytozome                                                         |
| <i>Vitis vinifera</i>             | PARP3        | GSVIVT01036149001           | 17841171   | Phytozome                                                         |
| <i>Nelumbo nucifera</i>           |              | NNU_16940-RA, 016940        |            | <a href="http://lotus-db.wbgcas.cn">http://lotus-db.wbgcas.cn</a> |
| <i>Mimulus guttatus</i>           | PARP3        | Migut.D02355.1.p            | 28927533   | Phytozome                                                         |
| <i>Solanum tuberosum</i>          | PARP3        | PGSC0003DMP400013102        | 37467110   | Phytozome                                                         |
| <i>Populus trichocarpa</i>        | PARP3        | Potri.004G184100.1.p        | 37232163   | Phytozome                                                         |
| <i>Oryza sativa</i>               | PARP3        | LOC_Os02g32860.1            | 33139988   | Phytozome                                                         |
| <i>Sorghum bicolor</i>            | PARP3        | Sobic.004G164800.1.p        | 32746215   | Phytozome                                                         |
| <i>Picea abies</i>                |              | 125674g0010                 |            | ConGenIE                                                          |
| <i>Ginkgo biloba</i>              |              | 02125                       |            | GigaDB                                                            |
| <i>Selaginella moellendorffii</i> | PARP3        | 73333                       | 15406099   | Phytozome                                                         |
| <i>Physcomitrella patens</i>      | PARP3        | Pp3c1_22640V3.1.p           | 32971758   | Phytozome                                                         |
| <i>Homo sapiens</i>               | PARP1        | ENST00000366794.9           |            | Ensembl                                                           |
| <i>Mus musculus</i>               | PARP1        | ENSMUST00000027777.11       |            | Ensembl                                                           |
| <i>Drosophila melanogaster</i>    | PARP         | FBr0113885                  |            | Ensembl                                                           |
| <i>Caenorhabditis elegans</i>     | PARP1        | Y71F9AL.18a                 |            | Ensembl                                                           |
| <i>Mycena alexandri</i>           | PARP         | 1092715                     |            | MycCosm                                                           |
| <i>Mycena alexandri</i>           | PARP         | 1127241                     |            | MycCosm                                                           |
| <i>Sarcoscypha coccinea</i>       | PARP         | 423918                      |            | MycCosm                                                           |
| <i>Sarcoscypha coccinea</i>       | PARP         | 510097                      |            | MycCosm                                                           |
| <i>Homo sapiens</i>               | PARP2        | ENST00000250416.9           |            | Ensembl                                                           |
| <i>Mus musculus</i>               | PARP2        | ENSMUST00000036126.5        |            | Ensembl                                                           |
| <i>Homo sapiens</i>               | PARP3        | ENST00000398755.7           |            | Ensembl                                                           |
| <i>Mus musculus</i>               | PARP3        | ENSMUST00000112479.8        |            | Ensembl                                                           |
| <i>Caenorhabditis elegans</i>     | PARP2        | E02H1.4                     |            | Ensembl                                                           |
| <i>Caenorhabditis elegans</i>     | TANK-1/PARP5 | ZK1005.1a                   |            | Ensembl                                                           |
